# Supplementary material for: Atlantinone A, a Meroterpenoid Produced by Penicillium ribeum and Several Cheese Associated Penicillium Species
Source: PubMed Central journal article supplement (PMC3901203; doi:10.3390/metabo2010214), 2012-02-23
Supplement: metabolites-02-00214-s001.pdf [file metabolites-02-00214-s001.pdf]

## Supplementary Material

### Atlantinone A, a Meroterpenoid Produced by *Penicillium ribeum* and Several Cheese Associated *Penicillium* Species

Petur W. Dalsgaard <sup>1</sup>, Bent O. Petersen <sup>2</sup>, Jens Ø. Duus <sup>3</sup>, Christian Zidorn <sup>4</sup>, Jens C. Frisvad <sup>5</sup>, Carsten Christophersen <sup>6</sup> and Thomas O. Larsen <sup>5,\*</sup>

Table 1. NMR data of atlantinone A <sup>a</sup> (2).

| Position        | <sup>1</sup> H | <sup>13</sup> C |
|-----------------|----------------|-----------------|
| 1 $\alpha$      | 1.33 1H, m     | 31.5            |
| 2 $\alpha$      | 1.73 1H, m     | 21.2            |
| 3               | 4.07 1H, s     | 83.0            |
| 4               |                | 36.4            |
| 5               | 1.32 1H, m     | 50.7            |
| 6 $\alpha$      | 1.16 1H, m     | 21.2            |
| 7 $\alpha$      | 1.93 1H, m     | 30.9            |
| 8               |                | 40.7            |
| 9               | 1.80 1H, s     | 45.4            |
| 10              |                | 44.8            |
| 11              | 5.35 1H, s     | 124.4           |
| 12              |                | 131.8 br.s      |
| 13              |                | 55.3            |
| 14              |                | 67.5 br.s       |
| 15 <sup>b</sup> |                |                 |
| 16              |                | 112.0 br.s      |
| 17 <sup>b</sup> |                |                 |
| 18              | 1.47 3H, s     | 6.9             |
| 19              |                | 170.6           |
| 20              | 1.09 3H, s     | 15.8            |
| 21              | 1.71 3H, s     | 19.5            |
| 22              | 1.25 3H, s     | 16.5            |
| 23              |                | 174.4           |
| 24              | 1.05 3H, s     | 27.2            |
| 25              | 0.92 3H, s     | 21.8            |
| 19-OMe          | 3.48 3H, s     | 51.1            |

<sup>a</sup> Measured in DMSO-*d*<sub>6</sub> (<sup>1</sup>H at 500 MHz, <sup>13</sup>C at 125 MHz) and referenced to solvent residual signals and solvent signals at 2.50 ppm (<sup>1</sup>H-NMR) and 39.50 ppm (<sup>13</sup>C-NMR). Numbering is arbitrary and follows the system used for citreohybridone derivatives (4); <sup>b</sup> Signals not observed.

**Structural elucidation.** The <sup>1</sup>H-NMR spectrum (Table 1) of **2** showed the presence of an olefinic proton ( $\delta_{\text{H}}$  5.35, C<sub>11</sub>-H), one methoxy group ( $\delta_{\text{H}}$  3.48, C<sub>19</sub>-OMe), one methyl group attached to a double bond ( $\delta_{\text{H}}$  1.71, H<sub>3</sub>-21), and four methyl groups connected to quaternary carbons [ $\delta_{\text{H}}$  0.92 (H<sub>3</sub>-25), 1.05 (H<sub>3</sub>-24),  $\delta_{\text{H}}$  1.09 (H<sub>3</sub>-20), 1.25 (H<sub>3</sub>-22)]. The <sup>13</sup>C-NMR exhibits 24 carbon signals including signals assigned to two carbonyl carbons [ $\delta_{\text{C}}$  170.6 (C-19),  $\delta_{\text{C}}$  174.4 (C-23)], two olefinic carbons [ $\delta_{\text{C}}$  124.4 (C-11),  $\delta_{\text{C}}$  131.8 (C-12)], two oxygenated carbons [one methine ( $\delta_{\text{C}}$  83.0, C-3) and one methoxycarbonyl ( $\delta_{\text{C}}$  51.1, C<sub>19</sub>-OMe)]. The signals originating from C-15 and C-17 was not observed owing to the fast equilibrium between the C-17-oxo-C-15-hydroxy, and C-17-hydroxy-C-15-oxo tautomeres. Analogue findings have been reported for other andrastins (1, 3). The gross structure of **2**

was determined by detailed analyses of one and two dimensional NMR spectra. From COSY data we inferred the presence of three partial structures; X-CH<sub>2</sub>-CH<sub>2</sub>-CH-X; X-CH<sub>2</sub>-CH<sub>2</sub>-CH-O-X and -CH-CH= . The HMBC cross peaks revealed these fragments to form part of the skeleton of ring A, B and C. The <sup>3</sup>J<sub>H-C</sub> established the presence of geminal methyl groups (C-24 and C-25) on the A ring together with a lactone bridge.

**Supplementary Figure 1.** Important HMBC connectivities in (**2**).

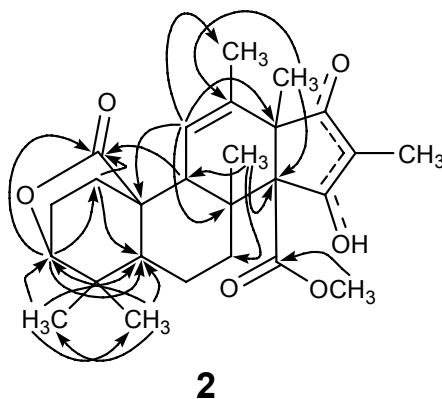

The low field shift of H-3 ( $\delta$  4.07) placed the oxygen on C-3. The HMBC connectivities between H-1b, H-3, H-5 and C-23 established the  $\gamma$ -lactone ring bridging C-3 and C-10. Broad carbon signals (C-14 and C-16) and the high field shifted carbon at  $\delta$  6.9 (C-18) are indicative of the presence of keto-enol tautomerism at the cyclopentane ring (ring D) as in andrastin A, B, C and D (1, 3). The remaining elements of **2** were connected as shown in Figure 2 in accordance with the HMBC connectivities observed.
